1

2

3

4 A new long-acting GLP-1 derivative 6- KTP ameliorates body  
5 weight and lipid metabolism in DIO mice

6

7

8 Peixiu Wang<sup>1</sup>, Yanhong Ran<sup>1\*</sup>

9

10

11

12 1. College of Life Science and Technology, Jinan University, Guangzhou, Guangdong, China

13

14 \* [tranyh@jnu.edu.cn](mailto:tranyh@jnu.edu.cn) (YR)

15 **Abstract**

16 As a global epidemic, obesity has become the biggest challenge facing  
17 global and public health. Glucagon-like peptide-1(GLP-1) has been able to  
18 inhibit appetite, slow gastric emptying and reduce body weight. We  
19 designed a novel long-acting GLP-1 derivative 6-KTP based on wild-type  
20 GLP-1 and performed its pharmacodynamics study on obesity in DIO mice.  
21 DIO mice were treated once daily with subcutaneous injections of 6-KTP  
22 (1.8 mg/kg body weight), Liraglutide (0.4 mg/kg body weight) or vehicle  
23 (phosphate buffered saline (PBS), pH 7.4) for 12 weeks. The results show  
24 that 6-KTP decreased food intake, induced anorexia and weight loss, and

25 improved blood lipid and lipid metabolism in DIO mice.

## 26 **Introduction**

27 Obesity is associated with morbidity and mortality of chronic diseases  
28 and other health problems, including cardiovascular disease, type II diabetes,  
29 musculoskeletal disorders and certain site-specific cancers, such as  
30 colorectal and breast cancer[1]. Obesity has clinical manifestations such as  
31 overweight, excessive body fat and imbalance of metabolism in the body. As  
32 the number of obese patients continues to increase, the treatment of obesity  
33 becomes a medical problem. In 2010, overweight and obesity caused an  
34 estimated 34 million deaths worldwide, which accounting for 3.9% of the  
35 total annual mortality rate [2]. In 2017, obesity has the fastest relative  
36 growth and became one of the top five risk factors for death and disability  
37 [3].

38 Glucagon-like peptide-1 (GLP-1) is a pro-glucagon secreted by  
39 intestinal L cells and pancreatic alpha cells [4]. Turton et al.[5] demonstrated  
40 that GLP-1 inhibits food intake through a mechanism mediated by the  
41 central nervous system (CNS). There also lots literatures have shown that  
42 GLP-1 can promote weight loss and improve lipid metabolism[6].Some  
43 studies have shown that systemic administration of GLP-1 or GLP-1  
44 receptor agonists reduces food intake, slows gastric emptying, and reduces  
45 body weight [7]. Therefore, GLP-1 has the potential to be developed into an  
46 anti-obesity drug, and GLP-1 receptor agonists Liraglutide have been used

47 as anti-obesity drugs for the treatment of obesity.

48       However, the half-life of GLP-1 is only 2-5 minutes in vivo, which  
49 severely limits the biological effects of GLP-1. Therefore, the development  
50 of GLP-1 mainly focuses on prolonging the half-life of GLP-1 and  
51 promoting its biological effects. A novel GLP-1 derivative was designed in  
52 our laboratory in the early stage. LPHSHRAHSLPP was used as the ABD  
53 sequence, FNPKTP as the Linker sequence, FNPK as thrombin recognition  
54 and restriction site, and TP as dipeptidyl peptidase enzyme hydrolysis site.  
55 Then the natural active GLP-1 (7-37) was ligated to obtain a long-acting  
56 GLP-1 derivative based on wild-type GLP-1[8]. We evaluated the kinetics  
57 and bioactivity of 6-KTP in DIO mice and its long-term effects on food and  
58 water intake, body weight, blood lipids, pancreas and fatty liver in the DIO  
59 mouse model of obesity.

## 60 **2 Materials and methods**

### 61 **2.1 Materials**

62       Long acting GLP-1 derivate 6-KTP was obtained in our molecular  
63 biology and biochemistry lab in Jinan University (China).

64       Normal diet (4% fat, 20% protein) were provided by the Jinan  
65 University Experimental Animal Management Center (China) and high  
66 fat/sugar diet ( 40% fat, 20% protein, 40% carbohydrates) were obtained  
67 from MaoSibeike biological technology(China).

### 68 **2.2 Animals and treatment**

69 C57BL/6 male mice (8 weeks old) obtained from Jinan Pengyue  
70 Experimental Animal Breeding Co. Ltd. were housed in stainless steel  
71 hanging cages (four to five per cage) under standard laboratory conditions  
72 (12:12 light: dark cycle, temperature 25–27°C, humidity 50%–60%), with  
73 free access to food and water. Animal treatment is in accordance with  
74 National Institute Health (NIH) guidelines and experimental protocols were  
75 approved by the Institutional Animals Care and Use Committee at Jinan  
76 University.

77 All animals were monitored for 2 weeks prior to any experimental  
78 procedures. Then the mice were divided in to 2 groups, HFD group (n=30)  
79 and the NC group (n=8) were fed with high fat diet and normal diet,  
80 respectively. The amount of diet and water was measured every day, and the  
81 weight of mice was measured every week to observe the status and weight  
82 changes of mice in each group.

83 Long-term treatment experiment of DIO mice with 6-KTP.  
84 Experiments were performed in mature male lean and diet-induced obese  
85 (DIO) C57BL/6J mice. The mice were divided in to 4 groups, 8 mice/ group,  
86 6-KTP group were peritoneal injection with 6-KTP every day (1800µg/kg of  
87 body weight) on DIO mice, Liraglutide group were peritoneal injection with  
88 Liraglutide every day (400µg/kg of body weight) on DIO mice, NC group  
89 were peritoneal injection with PBS every day (0.2ml/mice) on lean mice,  
90 DIO group were peritoneal injection with PBS every day (0.2ml/mice) on

91 DIO mice for 12 weeks. Food and water intake were measured daily, and the  
92 animals were weighed twice per week.

### 93 **2.3 Sample collection and biochemical parameters test**

94 At the end of the administration, the mice in each group were subjected  
95 with anesthesia, and blood samples were collected using cryotubes. Serum  
96 samples were obtained by centrifugation at 4°C, 1500 g for 20 minutes and  
97 then sent to the First Affiliated Hospital of Jinan University for testing.  
98 Blood lipids (TG, TC, LDL-C and HDL-C) were analyzed by biochemical  
99 auto analyzer. (Wako, Japan).

100 The adipose tissue were quickly removed, fixed in 4%  
101 paraformaldehyde for 24 hours, and then embedded in paraffin. Serial thin  
102 sections of 3 μm were sliced and stained with hematoxylin eosin (HE) for  
103 histopathology by light microscopy (Olympus BX51 Microscope, Japan).

### 104 **2.4 Data statistical analysis**

105 Student's t-test or one- or two-way ANOVA were performed to  
106 validate statistically significant parameters that are increased or decreased  
107 among these two groups. Data processed by Graph Pad Prism software were  
108 expressed in mean ± standard error of mean (SEM), and  $p \leq 0.05$  was  
109 considered statistically significant.

## 110 **3 Results**

### 111 **3.1 High fat diet increase body weight and food intake**

112 As shown in Fig 1, we confirmed that mice fed with high fat diet could

113 intake more food than that fed with normal diet. The average daily food  
114 intake dose of the mice in the HFD group was  $39.65 \pm 1.998\text{g}$ , and the NC  
115 group was  $19.93 \pm 0.9544\text{g}$ . The high fat diet led to an increase intake in the  
116 diet of mice in the HFD group, which was beneficial to lipid accumulation  
117 and promoted the construction of the obesity model. (Fig 1)

118 **Fig 1 Effect of high-fat diet on diet intake in each group** (\* $p < 0.05$ , \*\* $p < 0.01$ , \*\*\* $p < 0.001$ ,  
119 \*\*\*\* $p < 0.0001$ )

120 After 8 weeks, the body weight of the NC group and HFD group were  
121 increased. However, as shown in Fig 2, the body weight of the HFD group  
122 mice ( $31.48 \pm 0.83\text{g}$ ) was significantly higher than NC group mice ( $25.54 \pm$   
123  $0.61\text{g}$ ), approximately 23.25%, reached the obesity model standard. (Fig 2)

124 **Fig 2 Effect of high-fat diet on body weight in each group** (\* $p < 0.05$ , \*\* $p < 0.01$ ,  
125 \*\*\* $p < 0.001$ , \*\*\*\* $p < 0.0001$ )

### 126 **3.2 Effect of 6-KTP on body weight and food intake**

127 After a 12-week dosing cycle, statistical analysis of the amount of food  
128 intake in each group of mice showed that the long-acting GLP-1 derivative  
129 6-KTP can reduce the food intake of mice. The food intake in the 6-KTP  
130 group mice was significantly less than DIO group ( $p = 0.0197$ ). There was  
131 no significant difference between the 6-KTP group and the Liraglutide group  
132 (Fig 3).

133 **Fig 3 Effect of 6-KTP on food intake in DIO mice**

134 Repeated once-daily administration of 6-KTP or liraglutide to DIO  
135 mice, the body weight was significantly reduced (Fig 4). The body weight in  
136 the 6-KTP group mice was significantly less than DIO group ( $p = 0.0181$ ),  
137 whereas, there was no significant difference between the 6-KTP group and

138 the Liraglutide group. The results indicated that 6-KTP had the effect of  
139 reducing the body weight of the mice fed with high fat diet.

140 **Table 1 Comparison of body weight of mice before and after administration**

| Group             | Before treatment (g) | After treatment (g) |
|-------------------|----------------------|---------------------|
| NC group          | 26.17±1.57           | 27.91±1.55          |
| DIO group         | 31.57±1.88           | 39.30±4.40*         |
| 6-KTP group       | 32.07±2.37           | 28.71±1.08          |
| Liraglutide group | 31.60±2.26           | 29.64±0.82          |

141 **Fig 4 Body weight changes in each group after administration**

### 142 **3.3 Effect of 6-KTP on blood lipid metabolism**

143 To further investigate the potential changes of lipid metabolism,  
144 CHOL, TG, HDL-C and LDL-C were analyzed (Fig 5). Compared with the  
145 DIO group, the serum levels of Cholesterol (CHOL) were lower than that in  
146 the NC group, the 6-KTP group and the Liraglutide group (Fig 5A). There  
147 were significant differences between the NC group and the DIO group ( $p=$   
148 0.0008), between the 6-KTP group and the DIO group ( $p=0.0003$ ), between  
149 the Liraglutide group and the DIO group ( $p=0.0004$ ). There was no significant  
150 difference between the other groups. There was no significant difference  
151 between the groups of the triglyceride (TG) levels yet (Fig 5B). The levels  
152 of serum high density lipoprotein (HDL-C) in the NC group, 6-KTP group  
153 and Liraglutide group were lower compared with the DIO group (Fig 5C).  
154 There were significant differences between the NC group and the DIO group  
155 ( $p = 0.0006$ ), between 6-KTP group and DIO group ( $p = 0.0003$ ), between  
156 Liraglutide group and DIO group ( $p = 0.0003$ ). There were no significant

157 differences between other groups. The levels of low-density lipoprotein  
158 (LDL-C) in the NC group, the 6-KTP group, and the Liraglutide group were  
159 lower than DIO group (Fig 5D). There were significant differences between  
160 the NC group and the DIO group ( $p=0.0160$ ), between the 6-KTP group and  
161 the DIO group ( $p=0.0108$ ), between the Liraglutide group and the DIO  
162 group ( $p=0.0203$ ). There was no significant difference between the 6-KTP  
163 group and Liraglutide group. (Fig 5)

164 **Fig 5 Serum lipid levels in each group of mice** (\* $p<0.05$ , \*\* $p<0.01$ , \*\*\* $p<0.001$ ,  
165 \*\*\*\* $p<0.0001$ )

166 Obvious pathological changes were found in adipose tissue (Fig 6). The  
167 DIO group had larger fat cells and more fat accumulation. The fat cells in  
168 the 6-KTP group were smaller and had less fat accumulation. There was no  
169 significant difference between the 6-KTP group and the Liraglutide group.  
170 As shown in Fig 7, the cross-sectional area of the adipocytes in the 6-KTP  
171 group was significantly reduced compared with the DIO group, and there  
172 was a statistically significant difference ( $p < 0.0001$ ). There was no  
173 significant difference in the cross-sectional area of fat cells in the 6-KTP  
174 group compared with the cross-sectional area of the fat cells in the  
175 Liraglutide group. (Fig 6,7)

176 **Fig 6 Morphological changes of adipose tissue in each group (H&E,  $\times 200$ )**

177 **Fig 7 Adipocyte cross-sectional area in each group ( $\mu\text{m}^2$ )** (\* $p<0.05$ , \*\* $p<0.01$ , \*\*\* $p<0.001$ ,  
178 \*\*\*\* $p<0.0001$ )

## 179 **4 Discussions**

180 Obesity can be divided into three categories according to its causes,



181 including hereditary obesity, secondary obesity and simple obesity. People  
182 intake more high fat and high calories food with the improvement of life,  
183 which is the main cause of obesity. A large number of studies indicated that  
184 people and animals have obesity susceptibility under high-fat diet conditions  
185 [9]. A study found that high fat diet induced obesity caused resistance to  
186 insulin signaling in the major PI3K and ERK signaling pathways, and the  
187 results suggest that the process is mediated by inflammation within BAT  
188 itself.

189 It has been shown[10] that GLP-1 has an effect on increasing satiety  
190 and suppressing appetite. GLP-1 exerts this effect through various pathways.  
191 In rodents, intraventricular injection of GLP-1 can reduce food intake. In  
192 human patients, injection of GLP-1 can also increase satiety and reduce  
193 energy intake. Many ring-shaped organs, including the infraorbital organs,  
194 organ blood vessels at the end of the lamina, median bulges, posterior  
195 pituitary and posterior regions, contain high-density GLP-1 binding  
196 sites[11]. These sites may function as a window of the brain, and the  
197 peripherally released GLP-1 affects the CNS through this pathway. Our  
198 results also show that the long-acting GLP-1 derivative 6-KTP has an effect  
199 of suppressing appetite and reducing the amount of food.

200 This is consistent with the literature[12], animal model tests show that  
201 GLP-1 drug Liraglutide mainly reduces body weight by reducing energy  
202 intake mechanism, may also change food preferences and maintain energy

203 consumption to reduce body weight. The results showed that the long-acting  
204 GLP-1 drug 6-KTP can inhibit the weight gain of the high fat diet-induced  
205 obese mouse model and promote its weight loss. Compared with the positive  
206 drug Liraglutide, there was no significant difference in body weight between  
207 the two groups. Compared with the DIO group, the mice after 6-KTP  
208 treatment showed a significant decrease in body weight, and there was a  
209 statistically significant difference.

210 It has been reported in the literature [13], that Liraglutide has an effect  
211 on improving the levels of CHOL and LDL-C in patients. The results  
212 showed that after treatment with long-acting GLP-1 drug 6-KTP, the mice  
213 were treated with TG, CHOL and HDL- C and LDL-C levels have  
214 improved. The levels of CHOL, HDL-C and LDL-C were statistically  
215 different compared with the DIO group, and the TG levels were decreased  
216 but not statistically different. The four levels of blood lipids in the  
217 long-acting GLP-1 drug group 6-KTP group were not significantly different  
218 from those in the Liraglutide group, indicating that 6-KTP has the same  
219 effect as the positive drug. By comparing the four levels of blood lipids in  
220 the 6-KTP group and the DIO group, the results showed that 6-KTP can  
221 effectively improve the lipid metabolism disorder caused by the high-fat  
222 diet, promote the recovery of lipid metabolism, inhibit the abnormal  
223 accumulation of lipids, and thus achieve weight inhibition.

224 In obesity, white adipose tissue may become dysfunctional and thus

225 unable to expand properly to store excess energy, while at the systemic  
226 level, these dysfunctions lead to other tissues that regulate metabolic  
227 homeostasis (e.g. liver and endocrine pancreas) Ectopic fat deposition in the  
228 middle. This will lead to other diseases such as: insulin resistance  
229 progression and increased risk of T2DM[14]. The results showed that the  
230 6-KTP group adipose cells became smaller and adipose accumulation was  
231 reduced. There was no significant difference between the Liraglutide and the  
232 6-KTP. 6-KTP can inhibit fat accumulation and promote adipose  
233 degradation, thereby promoting weight loss. In one study, liraglutide, a  
234 GLP-1R agonist administered, stimulated brown adipose tissue (BAT) heat  
235 production and adipocyte browning, and the mechanism controlling these  
236 effects was located in the hypothalamic ventromedial nucleus (VMH)[15].  
237 The mechanism controlling these actions is located in the hypothalamic  
238 ventromedial nucleus (VMH), and the activation of AMPK in this area is  
239 sufficient to blunt both central liraglutide-induced thermogenesis and  
240 adipocyte browning.

## 241 **5 Conclusions**

242 Our results indicated that the long-acting GLP-1 derivative 6-KTP can  
243 inhibit the increase of body weight in mice by reducing the amount of food.  
244 Furthermore, under GLP-1 drug treatment, there was no difference in the  
245 food intake and body weight gain in Liraglutide group. 6-KTP has the effect  
246 of promoting lipid metabolism and inhibiting fat accumulation, and there

247 was no significant difference between the results and the liraglutide group.  
248 The finding suggested the GLP-1 derivate 6-KTP may therefore affect the  
249 development of obesity and may be a promising new treatment in patients  
250 with this condition.

## 251 **References**

- 252 1. Kurniati N. Obesity and central obesity. *Medical Journal of Indonesia*. 2018;27(2).
- 253 2. Ng M, Fleming T, Robinson M, Thomson B, Graetz N, Margono C, et al. Global, regional, and  
254 national prevalence of overweight and obesity in children and adults during 1980–2013: a systematic  
255 analysis for the Global Burden of Disease Study 2013. *The Lancet*. 2014;384(9945):766-81. doi:  
256 10.1016/s0140-6736(14)60460-8.
- 257 3. Stanaway JD, Afshin A, Gakidou E, Lim SS, Abate D, Abate KH, et al. Global, regional, and national  
258 comparative risk assessment of 84 behavioural, environmental and occupational, and metabolic risks  
259 or clusters of risks for 195 countries and territories, 1990-2017: a systematic analysis for the Global  
260 Burden of Disease Study 2017. *Lancet*. 2018;392(10159):1923-94. PubMed PMID:  
261 WOS:000449710900007.
- 262 4. Baggio LL, Drucker DJ. Biology of Incretins: GLP-1 and GIP. *Gastroenterology*.  
263 2007;132(6):2131-57. doi: 10.1053/j.gastro.2007.03.054.
- 264 5. Turton MD, O'Shea D, Gunn I, Beak SA, Edwards CM, Meeran K, et al. A role for glucagon-like  
265 peptide-1 in the central regulation of feeding. *Nature*. 1996;379(6560):69-72. doi: 10.1038/379069a0.  
266 PubMed PMID: 8538742.
- 267 6. Iwasaki S, Hamada T, Chisaki I, Andou T, Sano N, Furuta A, et al. Mechanism-based  
268 pharmacokinetic/pharmacodynamic modeling of the glucagon-like peptide-1 receptor agonist  
269 exenatide to characterize its anti-obesity effects in diet-induced obese mice. *Journal of Pharmacology  
270 & Experimental Therapeutics*. 2017;jpet.117.242651.
- 271 7. Marathe CS, Rayner CK, Jones KL, Horowitz M. Effects of GLP-1 and Incretin-Based Therapies on  
272 Gastrointestinal Motor Function. *Exp Diabetes Res*. 2011;2011(1):279530.
- 273 8. Sang YX, Zhou T, Li H, Ran... Y. A new long-acting GLP-1 derivative KTP ameliorates hyperglycemia  
274 and dyslipidemia and improves pancreas and fatty liver indb/dbmice. *Science Bulletin*.  
275 2013;58(20):2447-53.
- 276 9. Roberts-Toler C, O'Neill BT, Cypess AM. Diet-induced obesity causes insulin resistance in mouse  
277 brown adipose tissue. *Obesity*. 2015;23(9):1765-70. doi: 10.1002/oby.21134. PubMed PMID:  
278 26242777; PubMed Central PMCID: PMC4551605.
- 279 10. Neff LM, Kushner RF. Emerging role of GLP-1 receptor agonists in the treatment of obesity.  
280 *Diabetes Metabolic Syndrome & Obesity Targets & Therapy*. 2010;3(default):263-73.
- 281 11. Larsen PJ, Holst JJ. Glucagon-related peptide 1 (GLP-1): hormone and neurotransmitter. *Regul  
282 Peptides*. 2005;128(2):97-107.
- 283 12. Knudsen LB. Liraglutide: the therapeutic promise from animal models. *International journal of  
284 clinical practice*. 2010;64:4-11. doi: 10.1111/j.1742-1241.2010.02499.x. PubMed PMID:  
285 WOS:000281949000002.

- 286 13. Jendle J, Nauck MA, Matthews DR, Frid A, Hermansen K, During M, et al. Weight loss with  
287 liraglutide, a once-daily human glucagon-like peptide-1 analogue for type 2 diabetes treatment as  
288 monotherapy or added to metformin, is primarily as a result of a reduction in fat tissue. *Diabetes*  
289 *Obes Metab.* 2009;11(12):1163-72. doi: 10.1111/j.1463-1326.2009.01158.x. PubMed PMID:  
290 WOS:000271630500009.
- 291 14. Kusminski CM, Bickel PE, Scherer PE. Targeting adipose tissue in the treatment of  
292 obesity-associated diabetes. *Nat Rev Drug Discov.* 2016;15(9):639-60. doi: 10.1038/nrd.2016.75.  
293 PubMed PMID: 27256476.
- 294 15. Beiroa D, Imbernon M, Gallego R, Senra A, Herranz D, Villarroya F, et al. GLP-1 Agonism  
295 Stimulates Brown Adipose Tissue Thermogenesis and Browning Through Hypothalamic AMPK.  
296 *Diabetes.* 2014;63(10):3346.  
297  
298

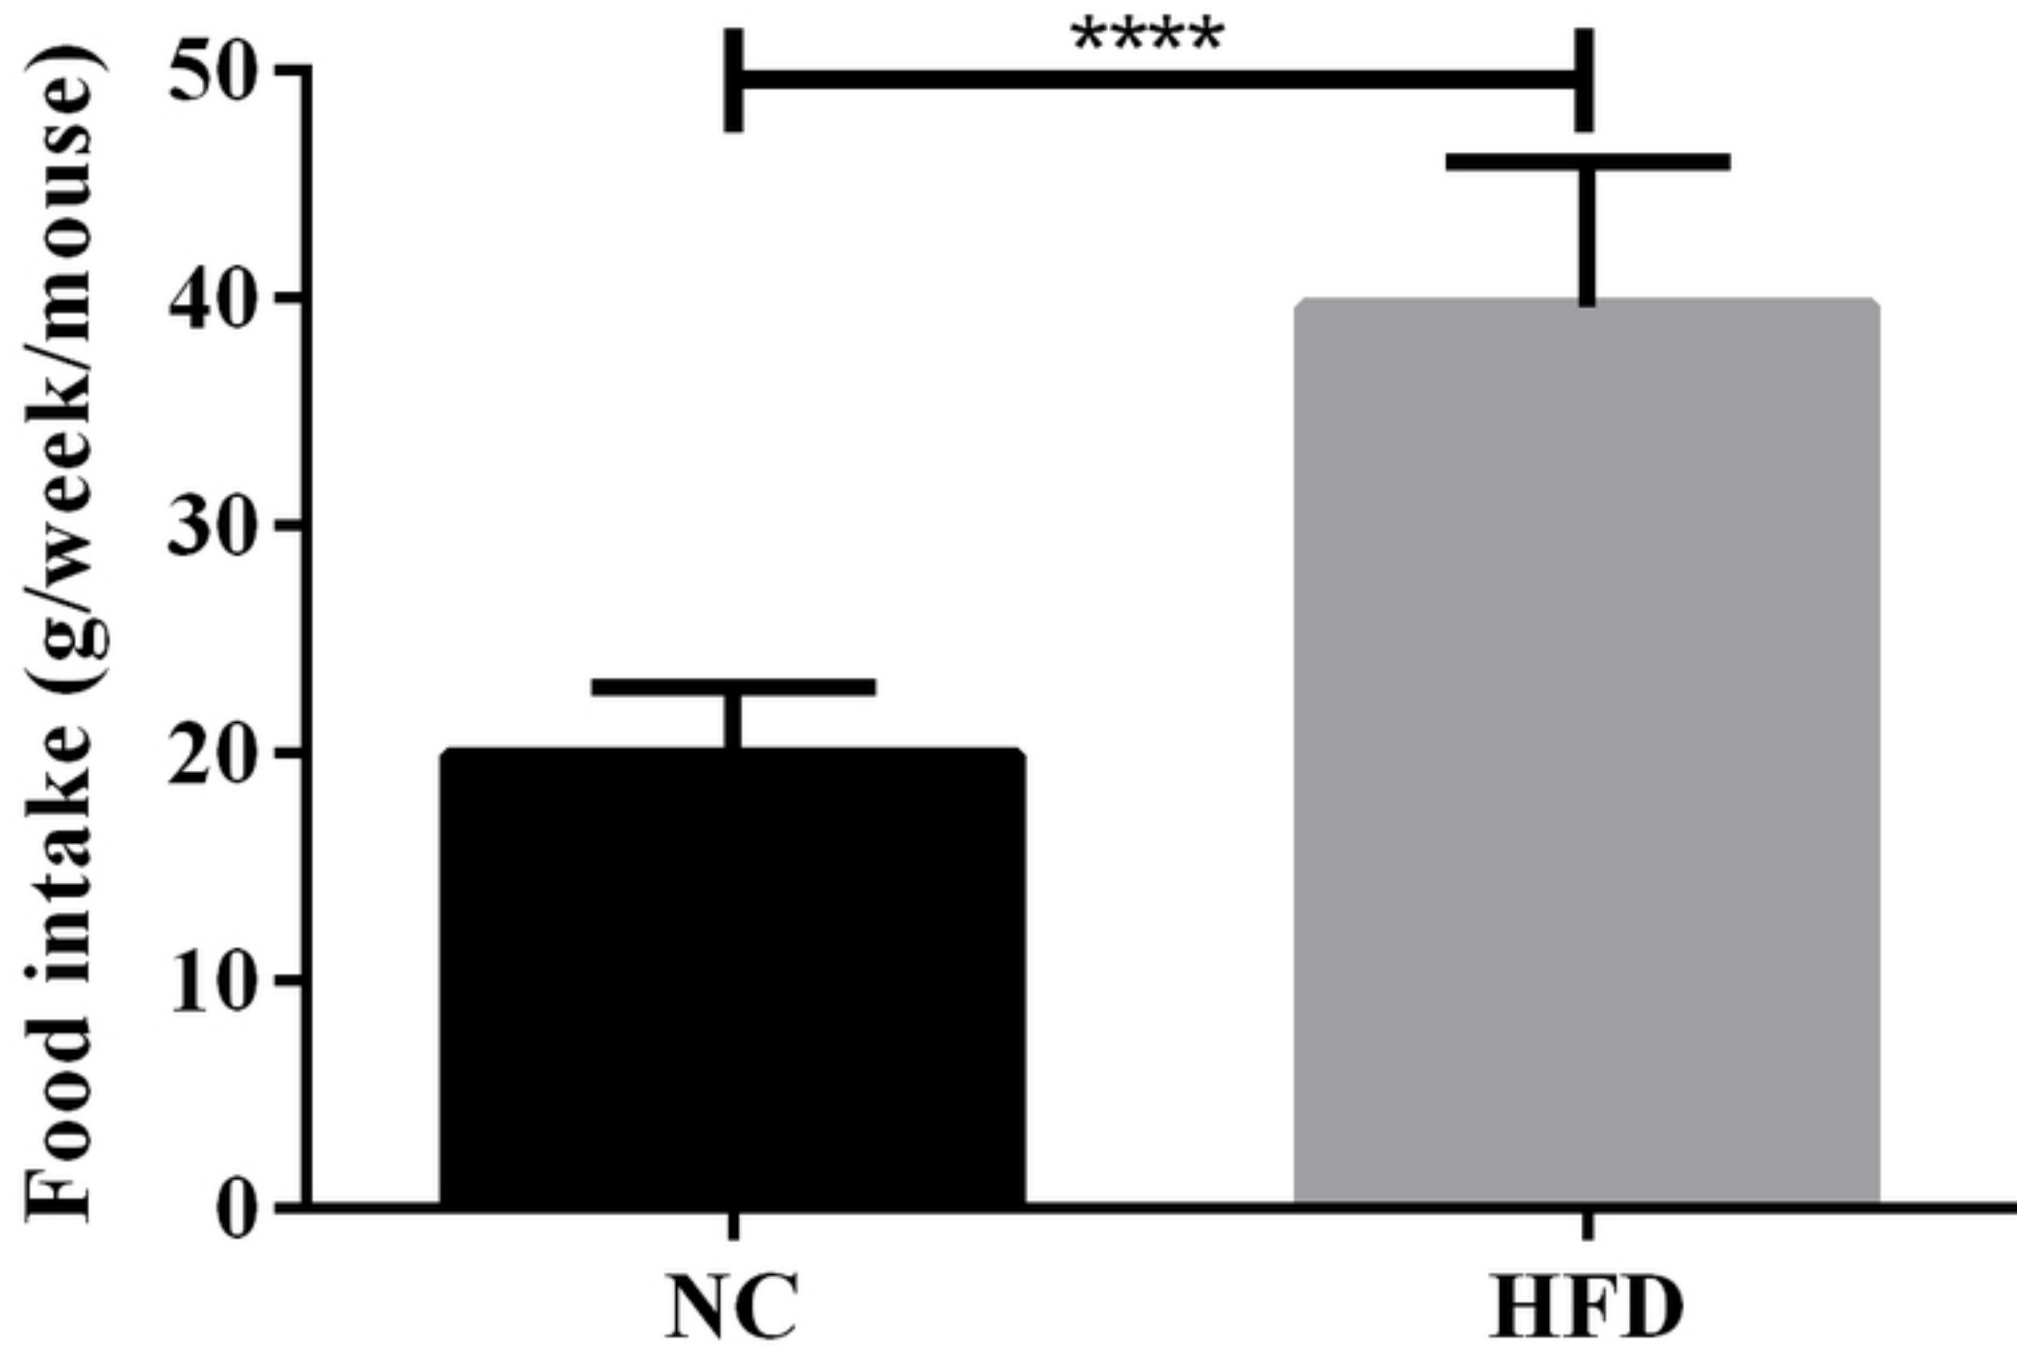

Figure

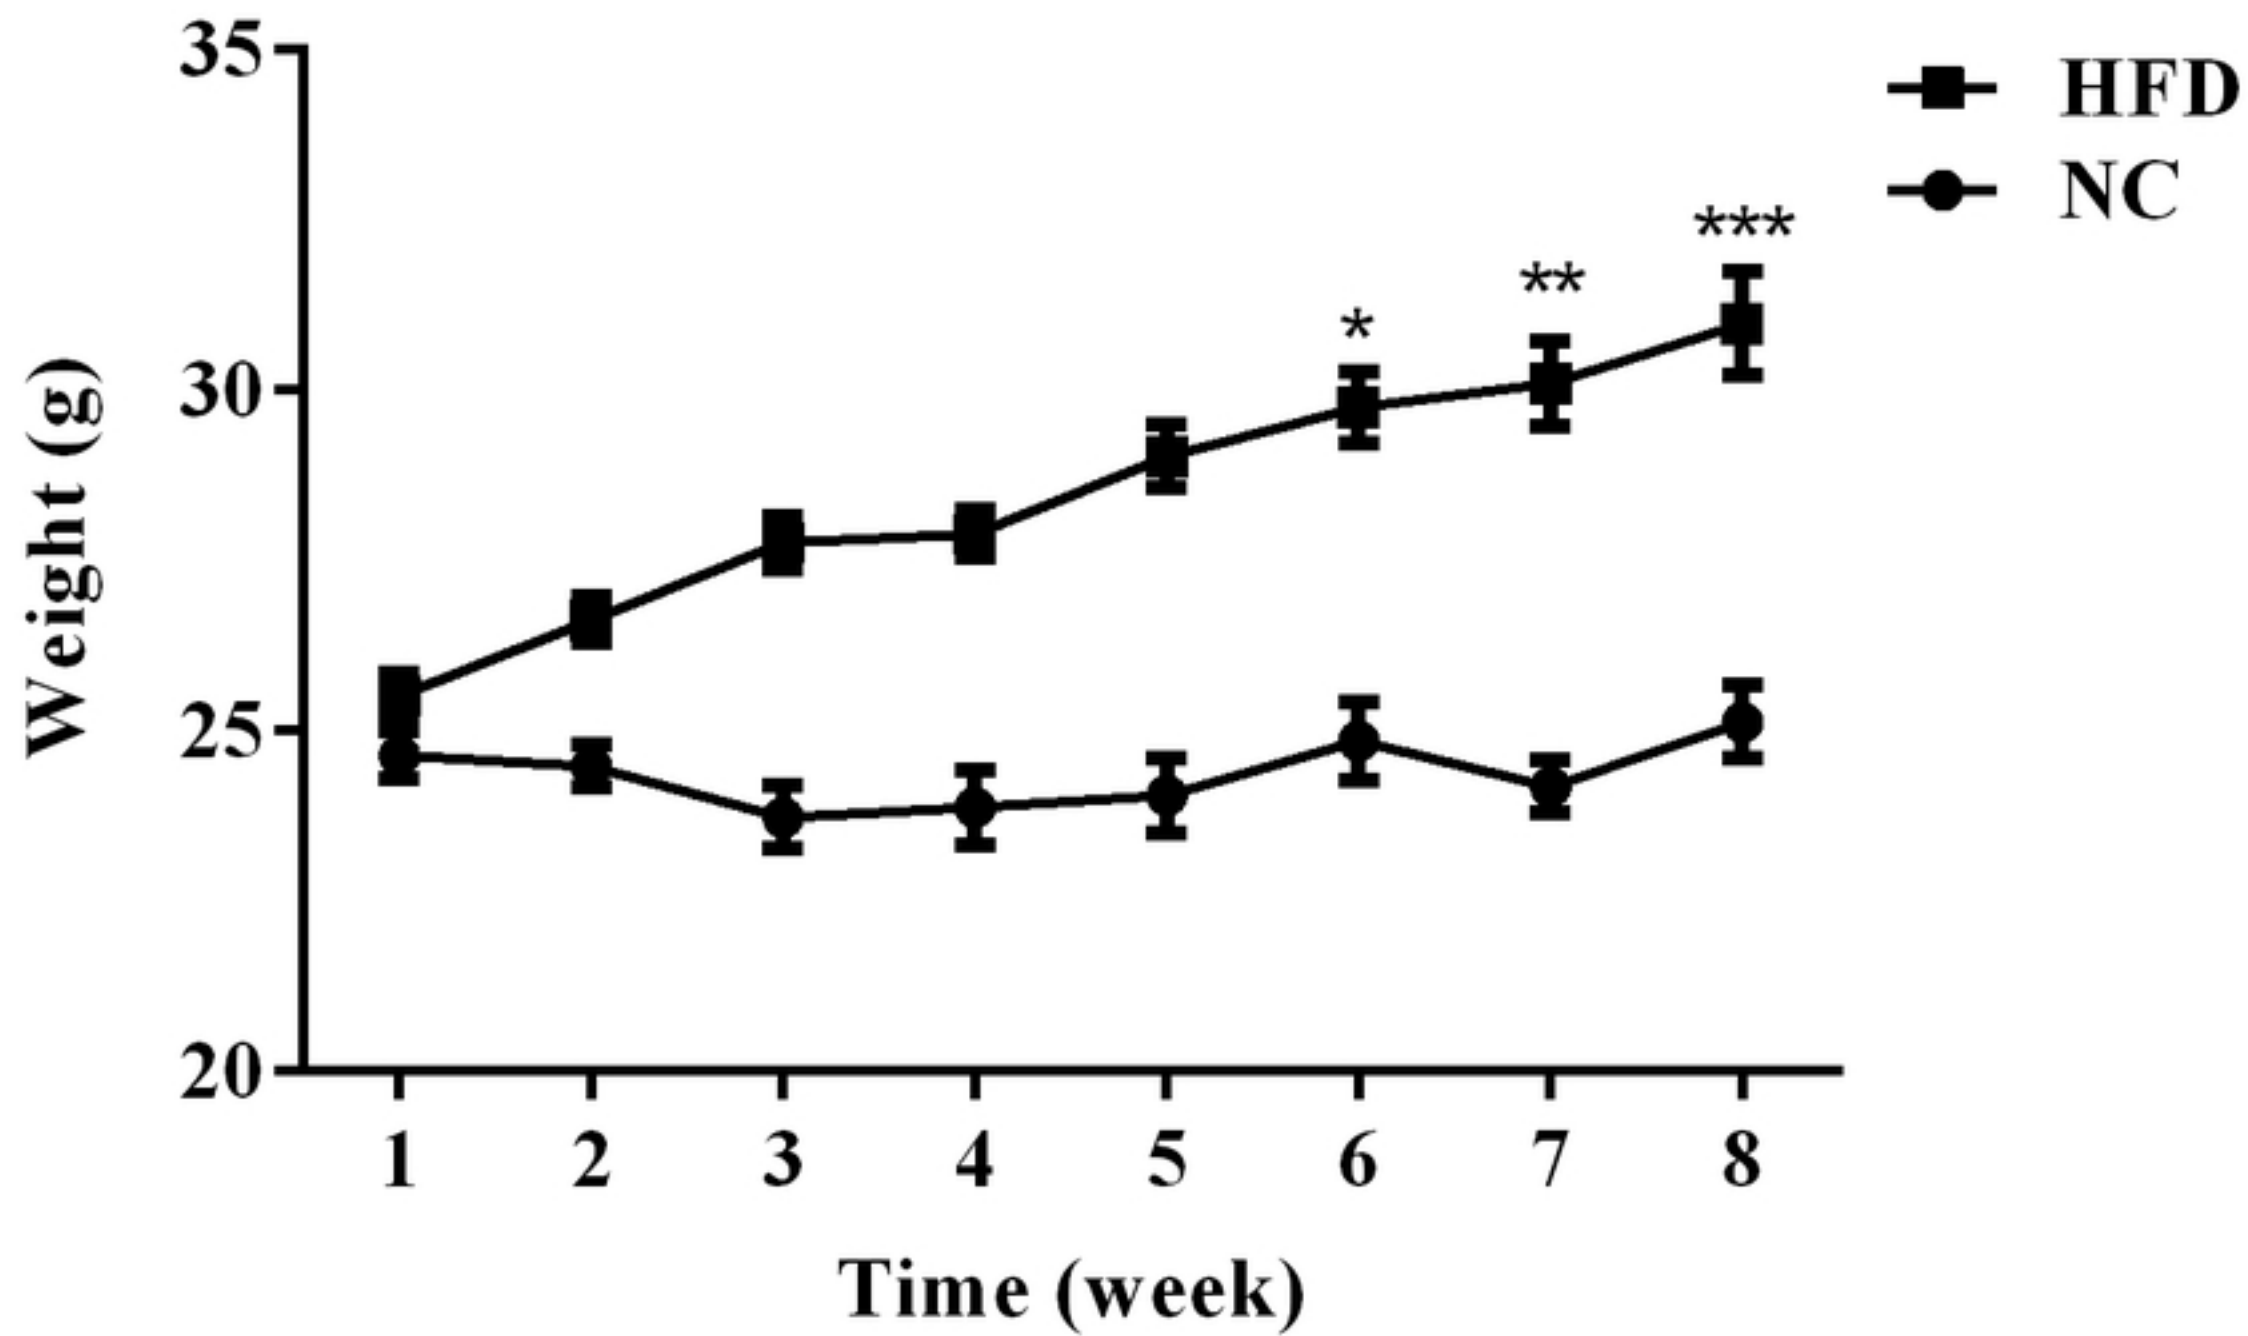

Figure

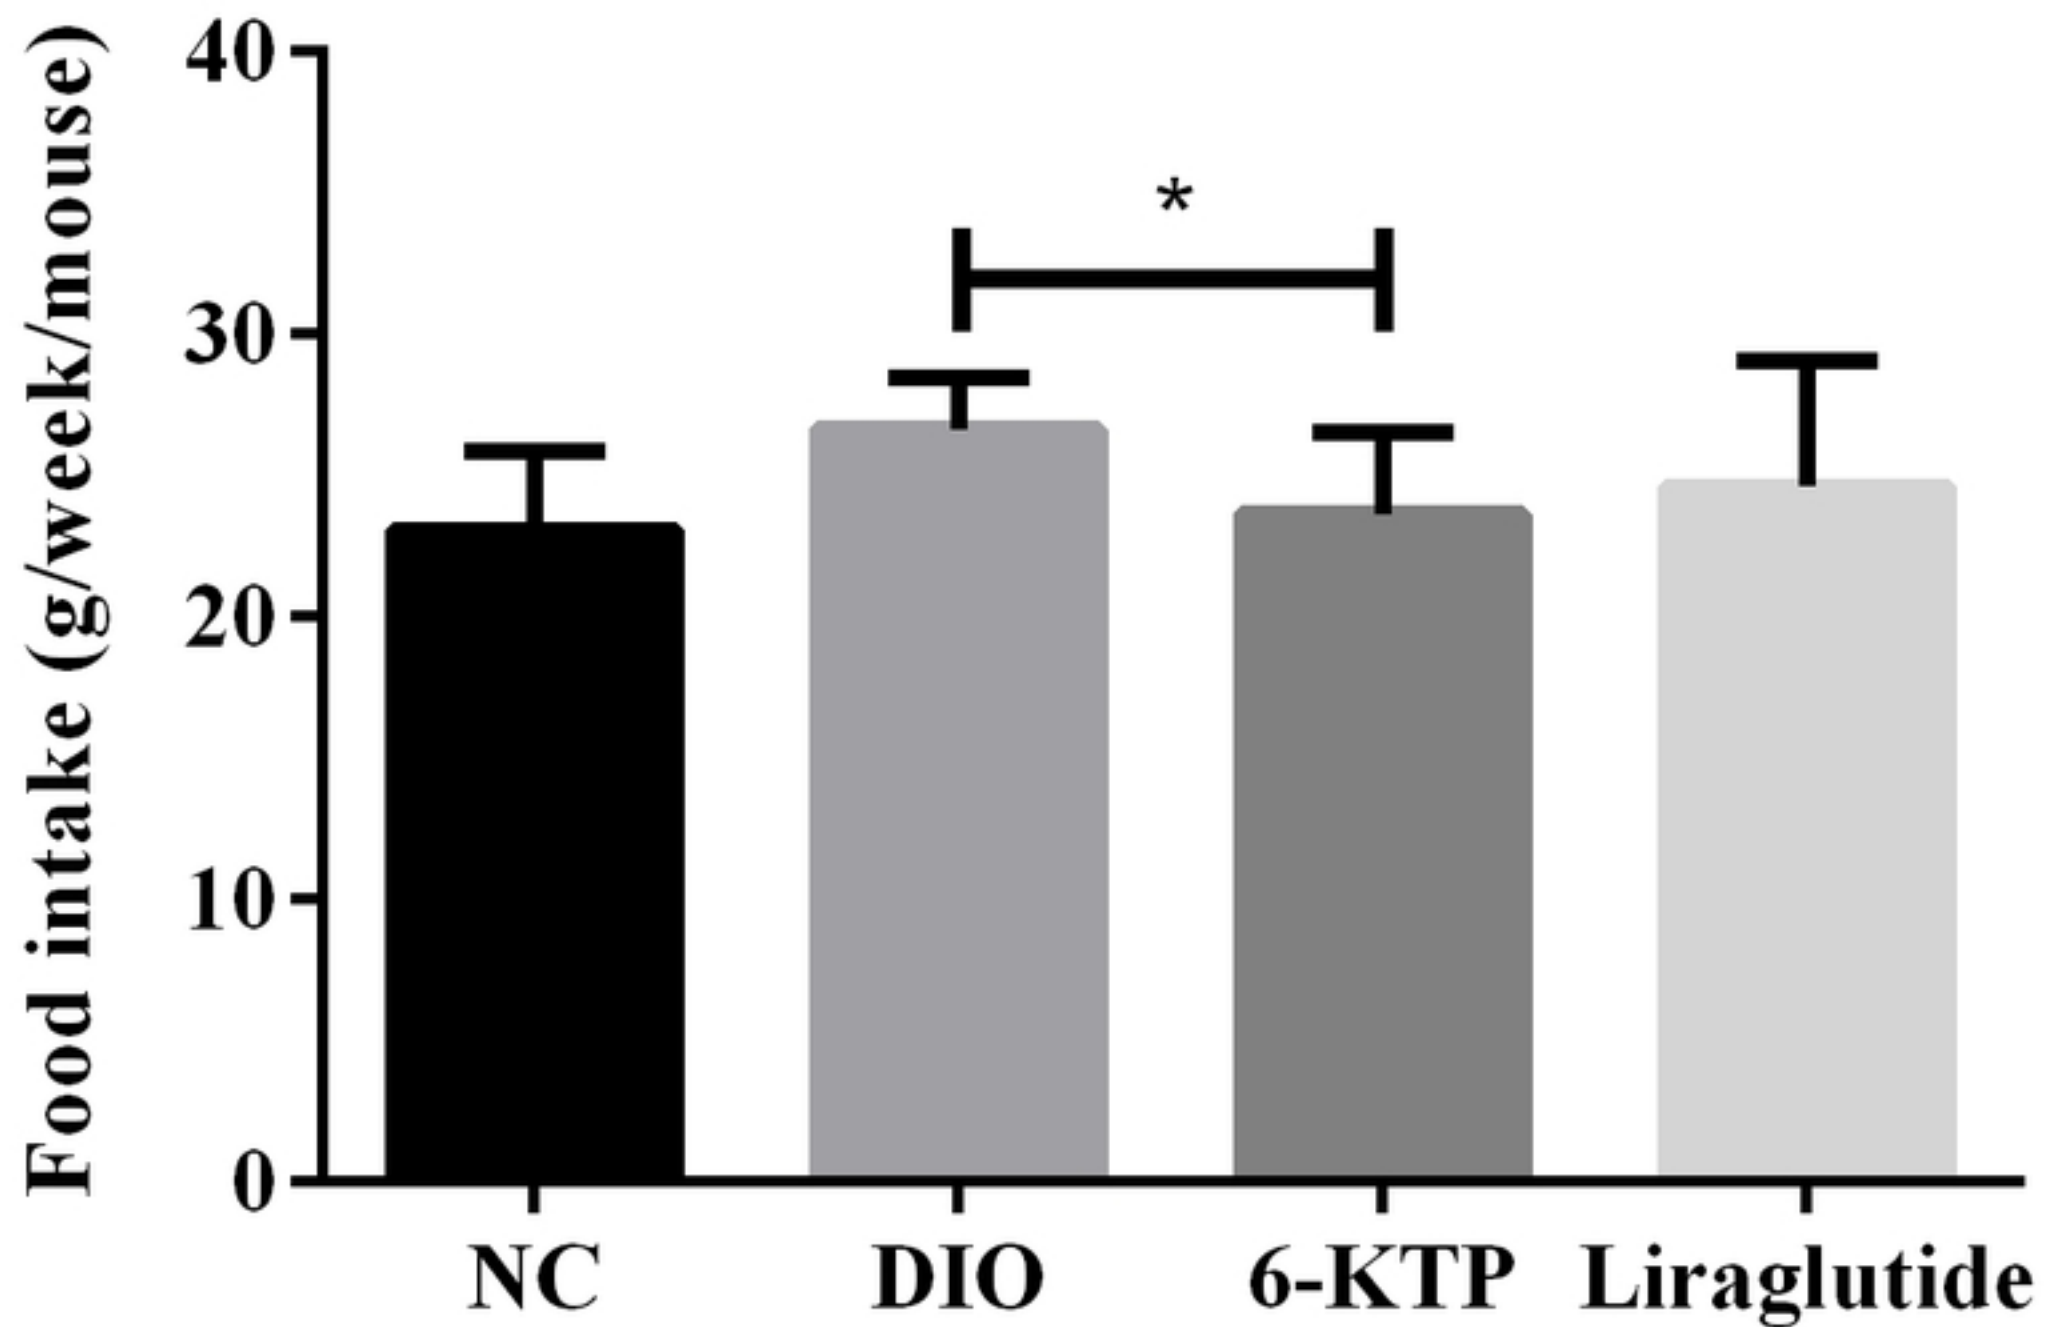

Figure



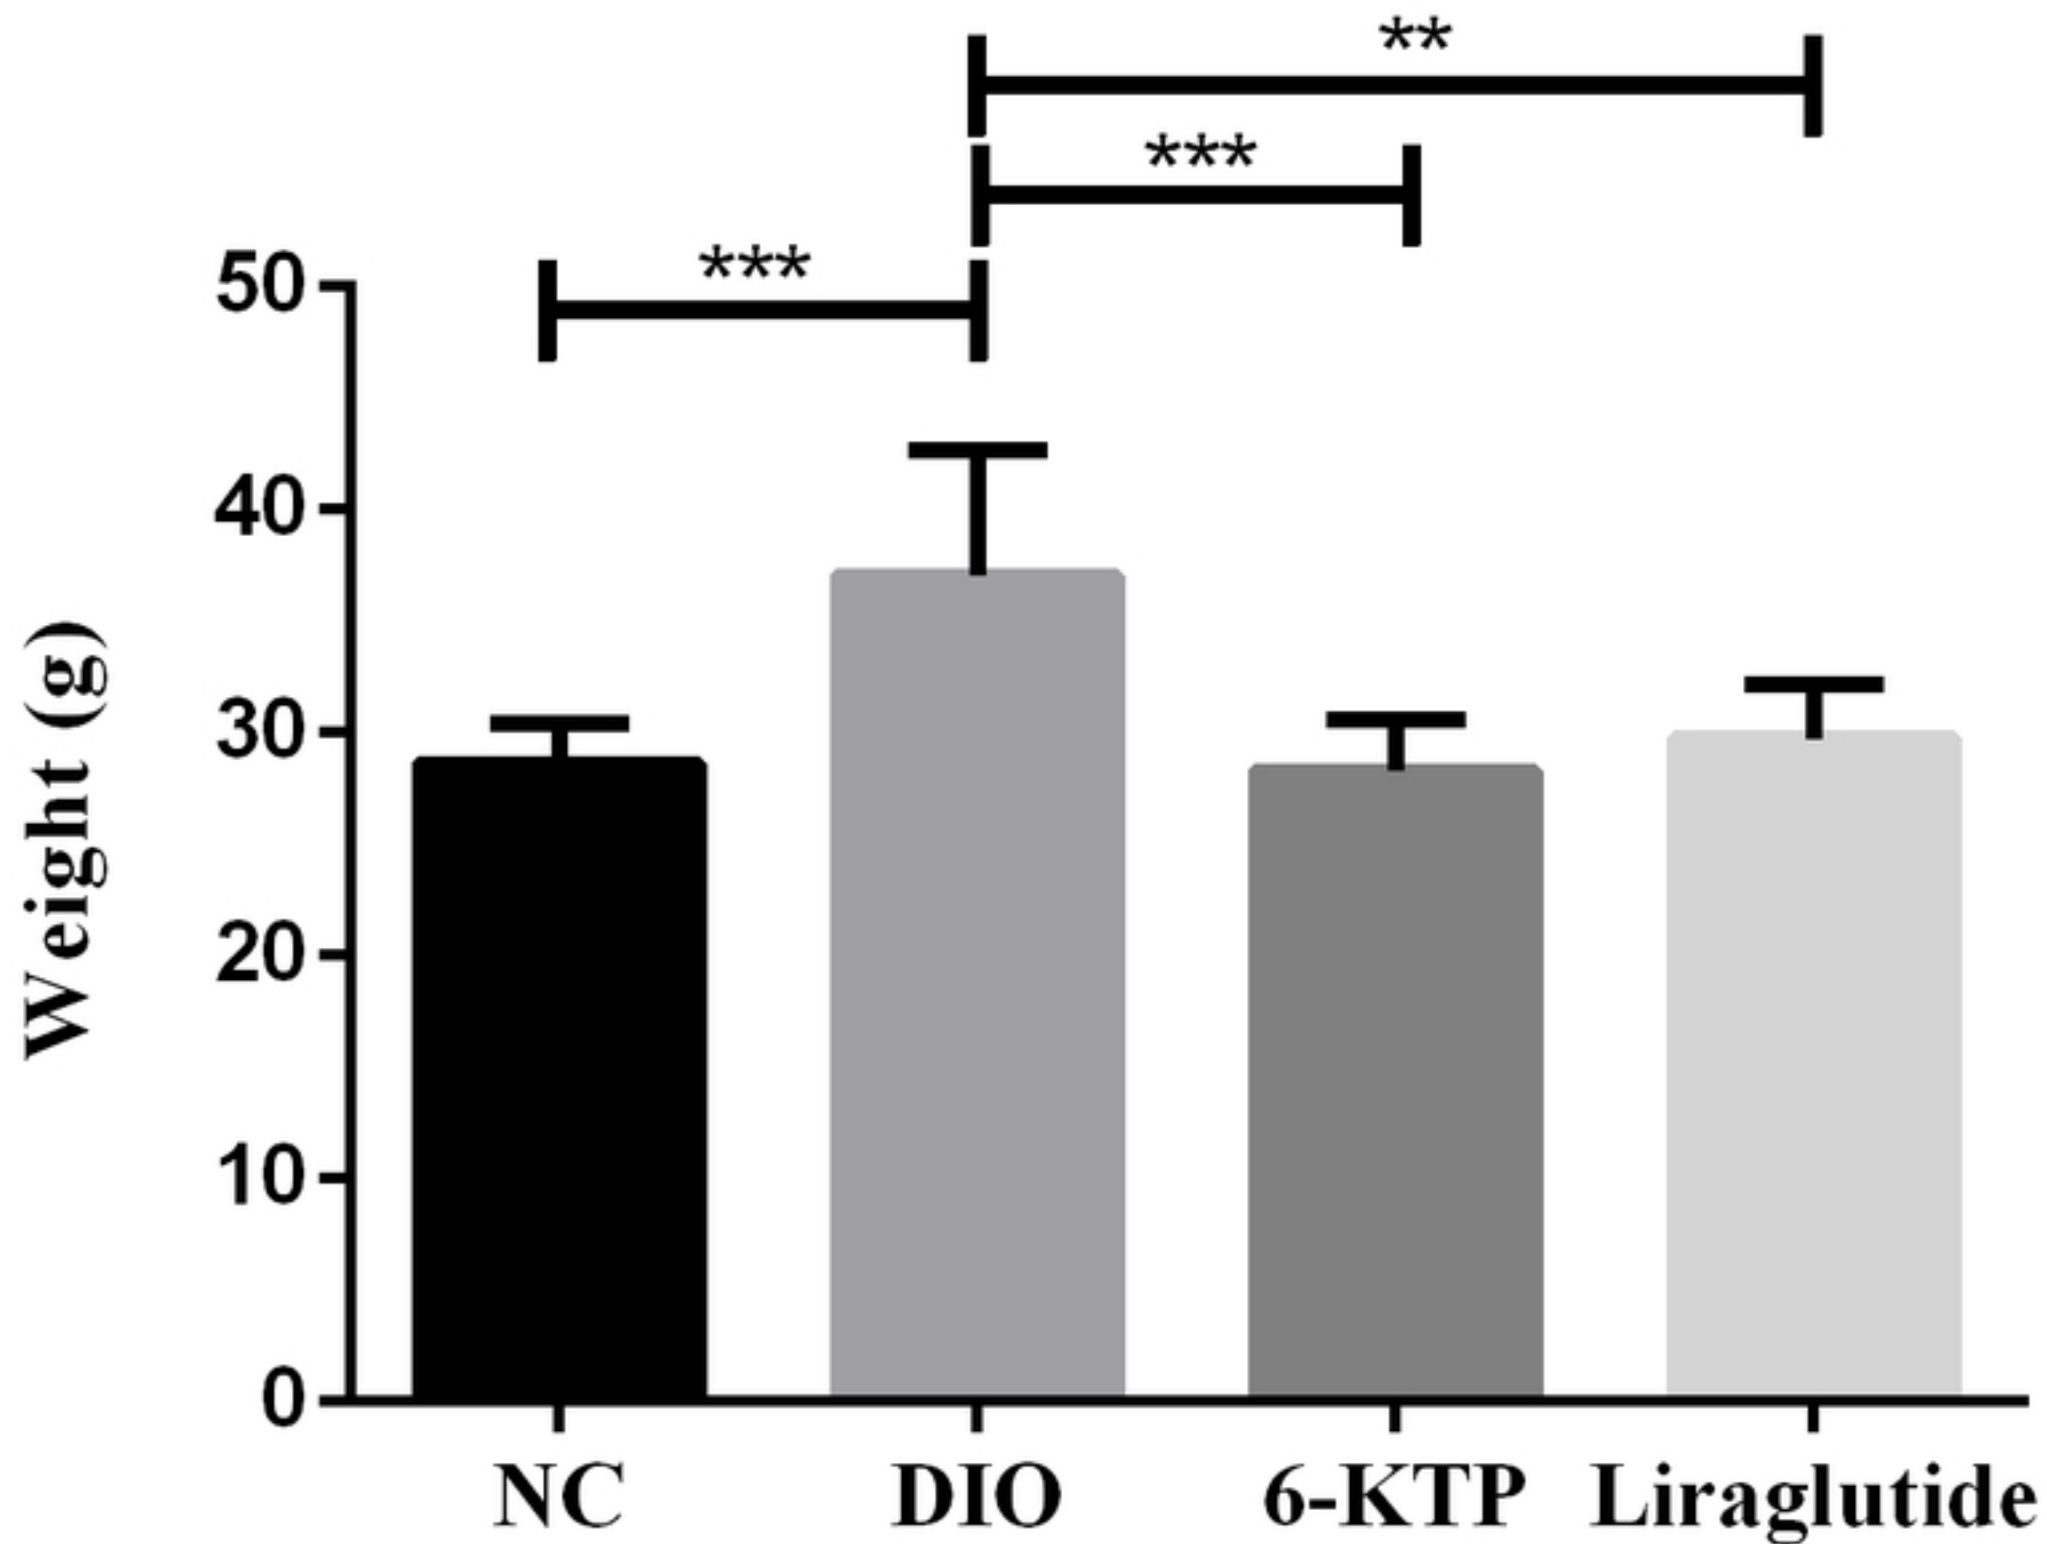

Figure

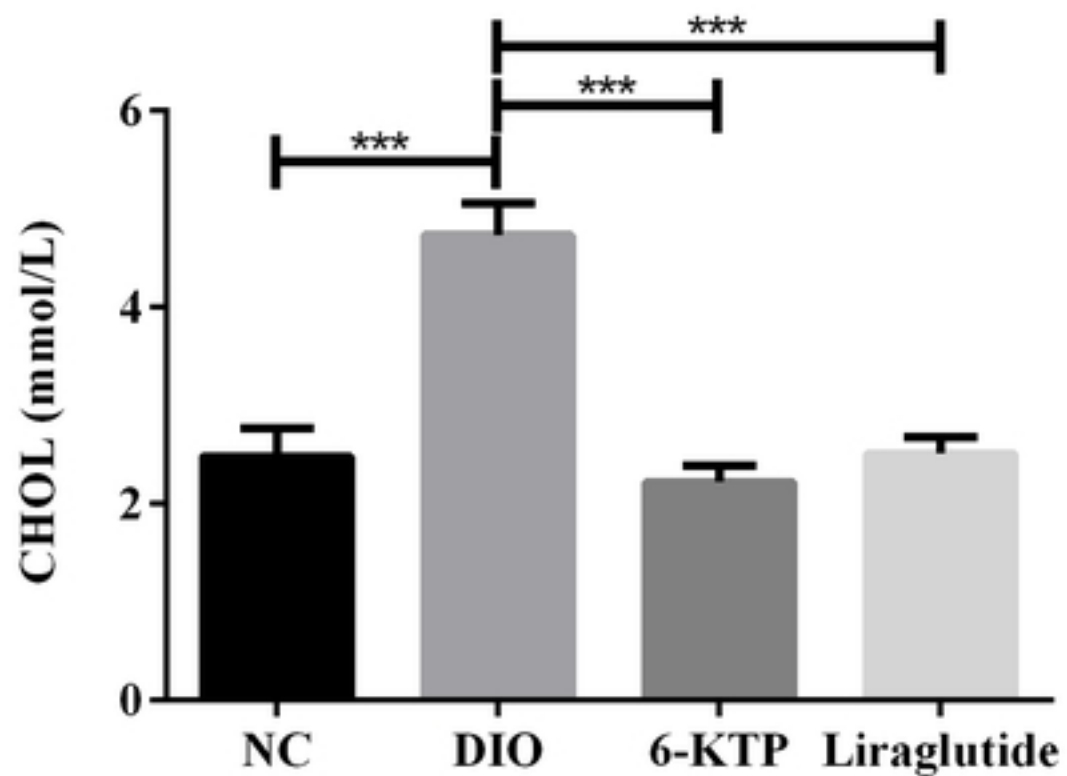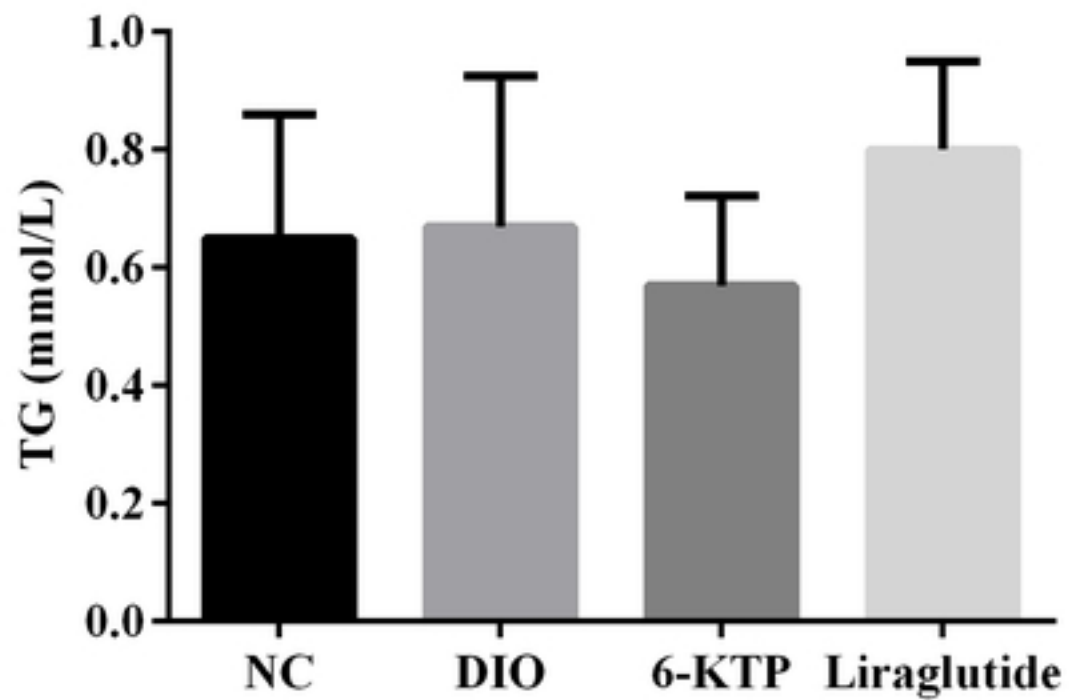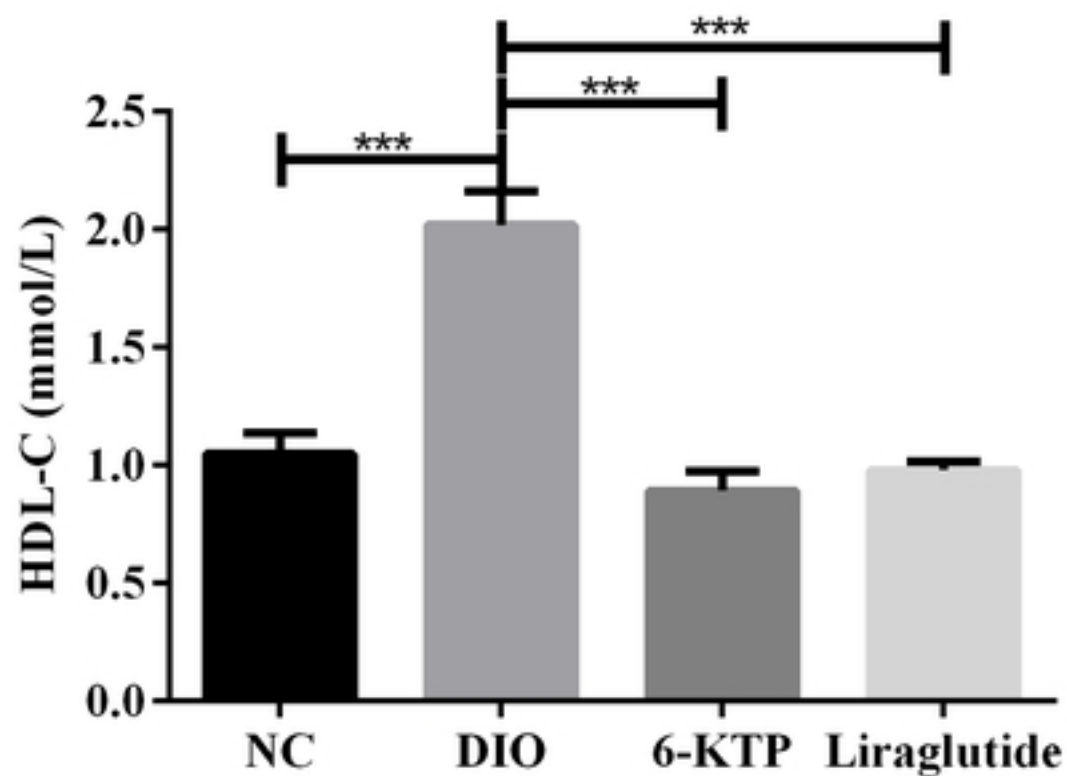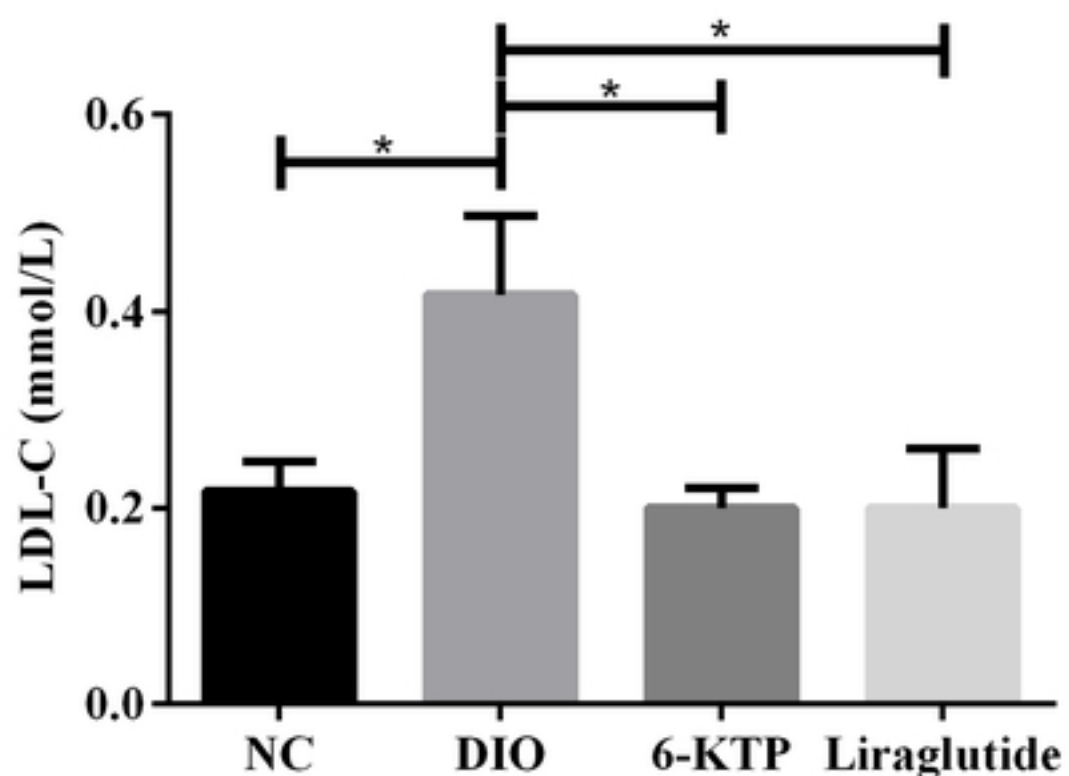

Figure

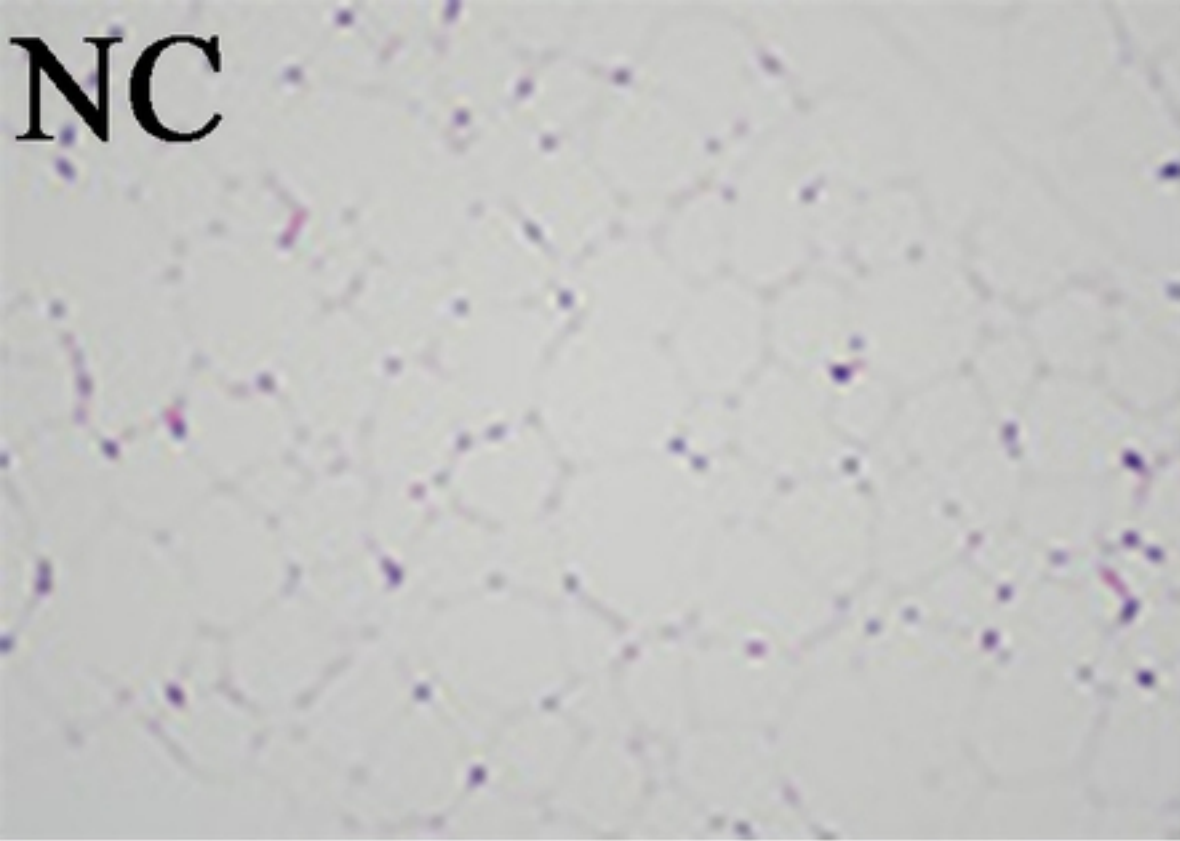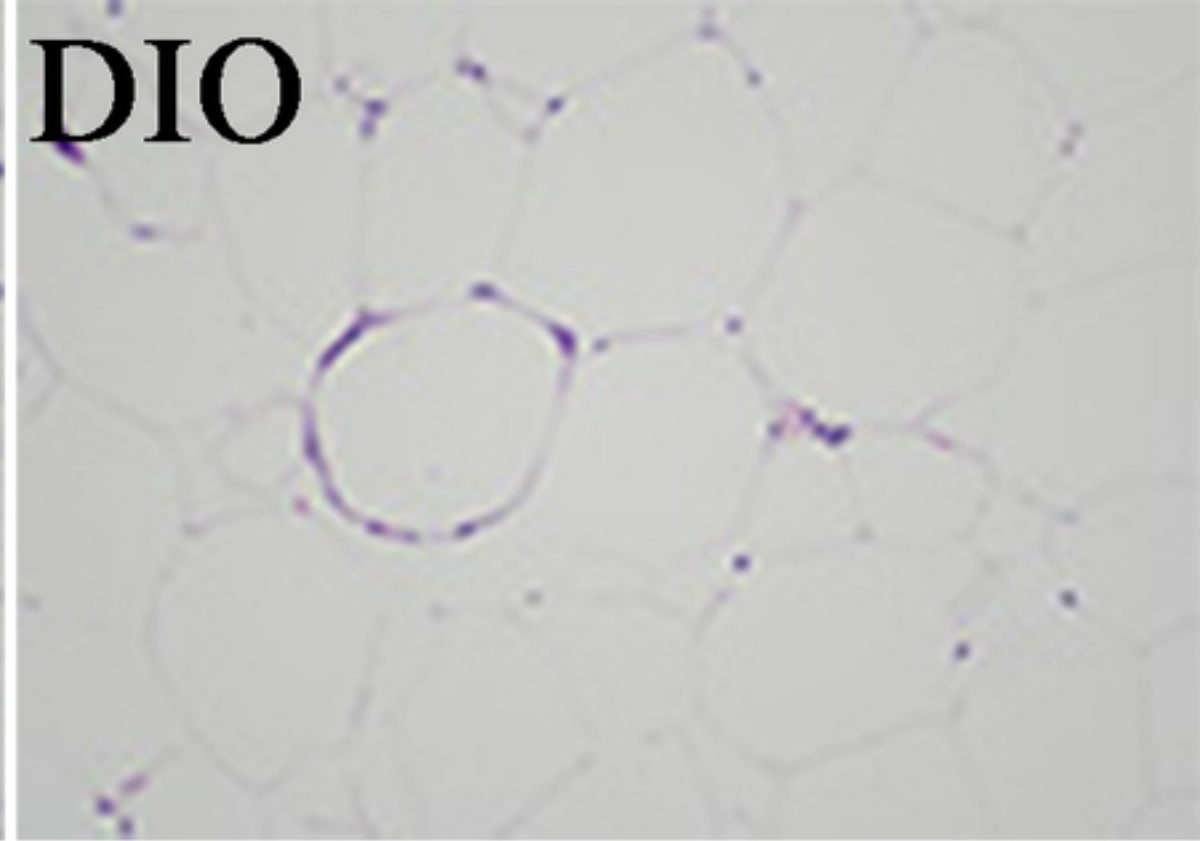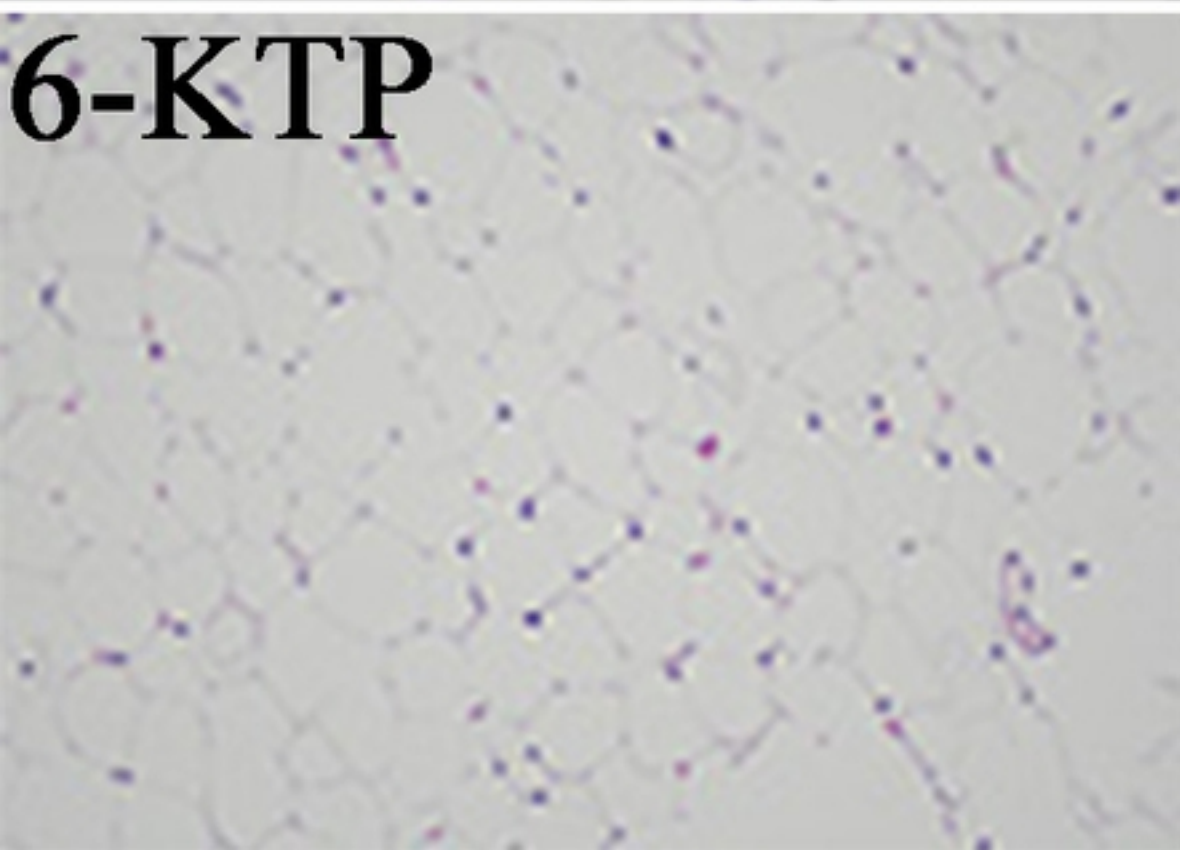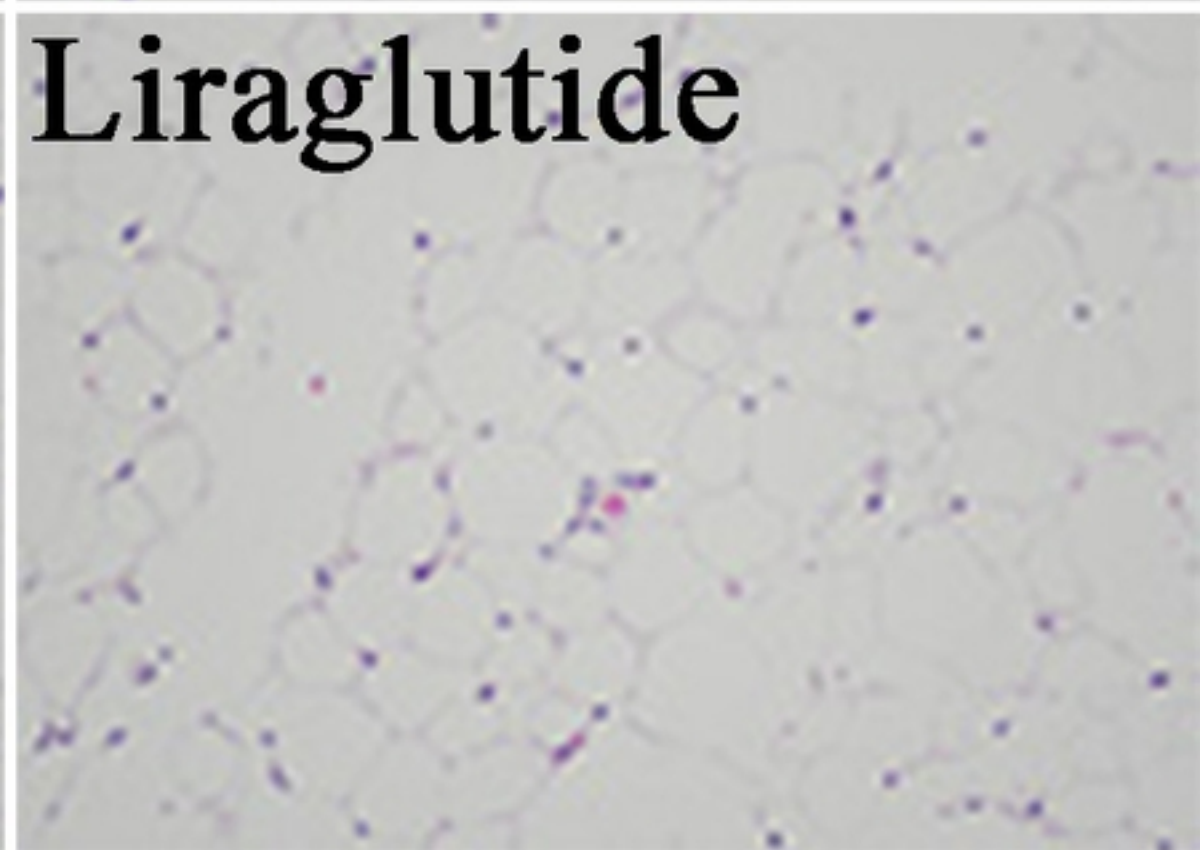

Figure

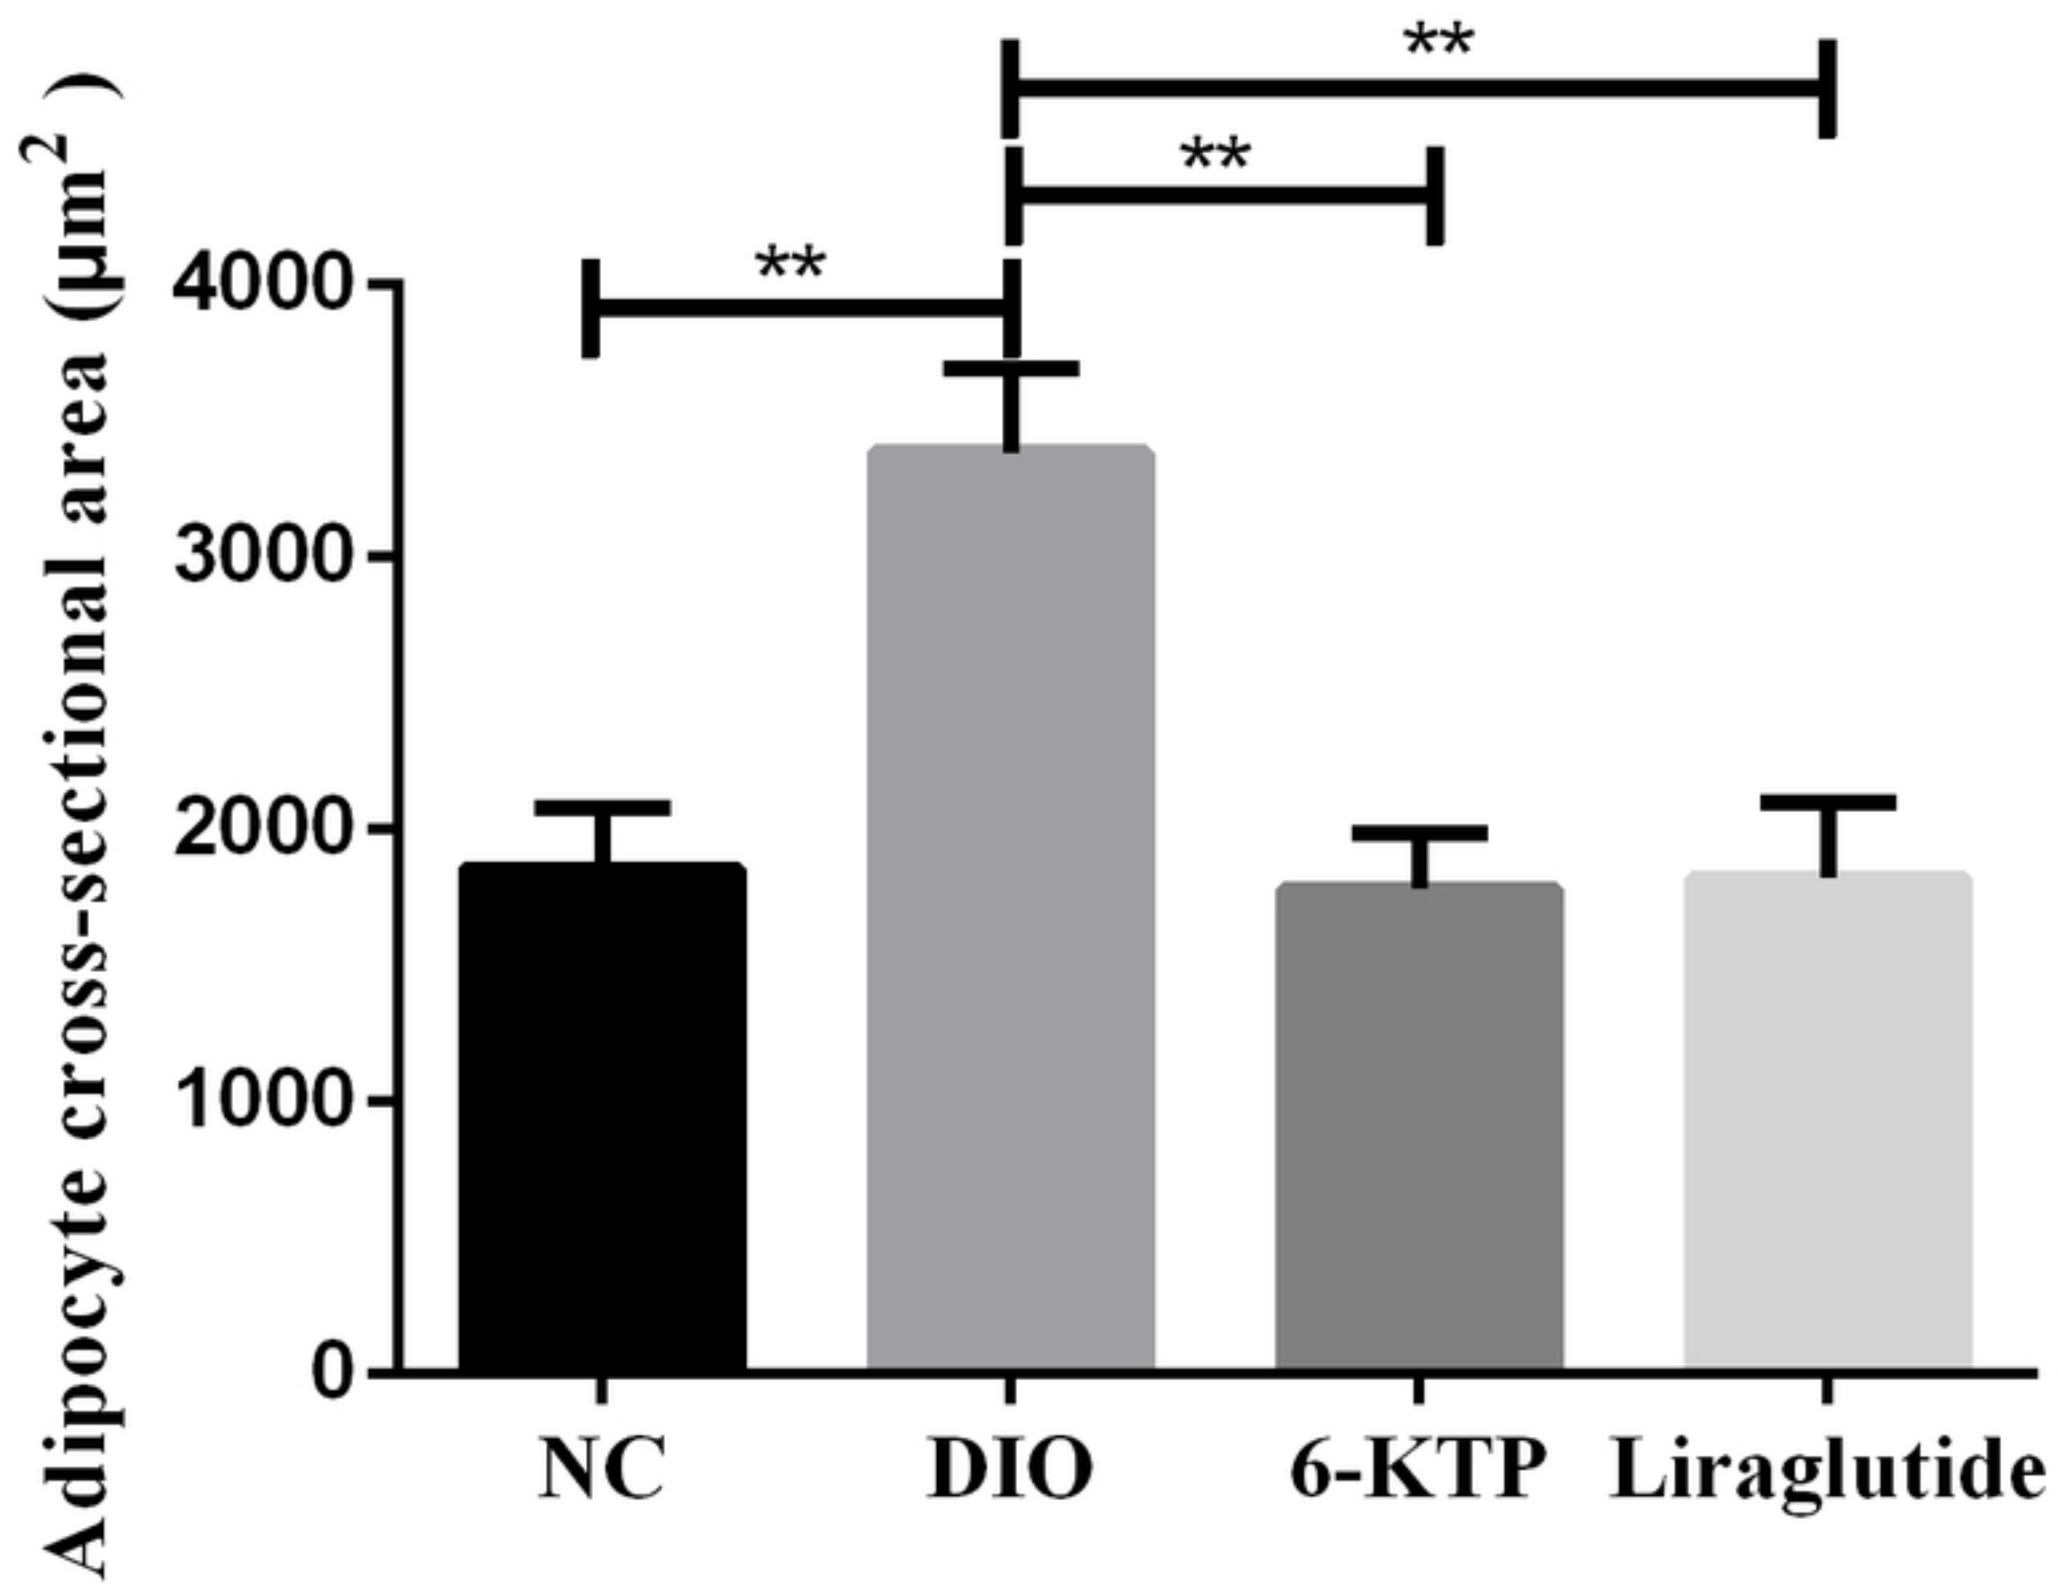

Figure
